# Supplementary material for: Genotyping and Phylogenetic Analysis of Yersinia pestis by MLVA: Insights into the Worldwide Expansion of Central Asia Plague Foci
Source: PubMed Central journal article supplement (PMC2694983; doi:10.1371/journal.pone.0006000), 2009-06-22

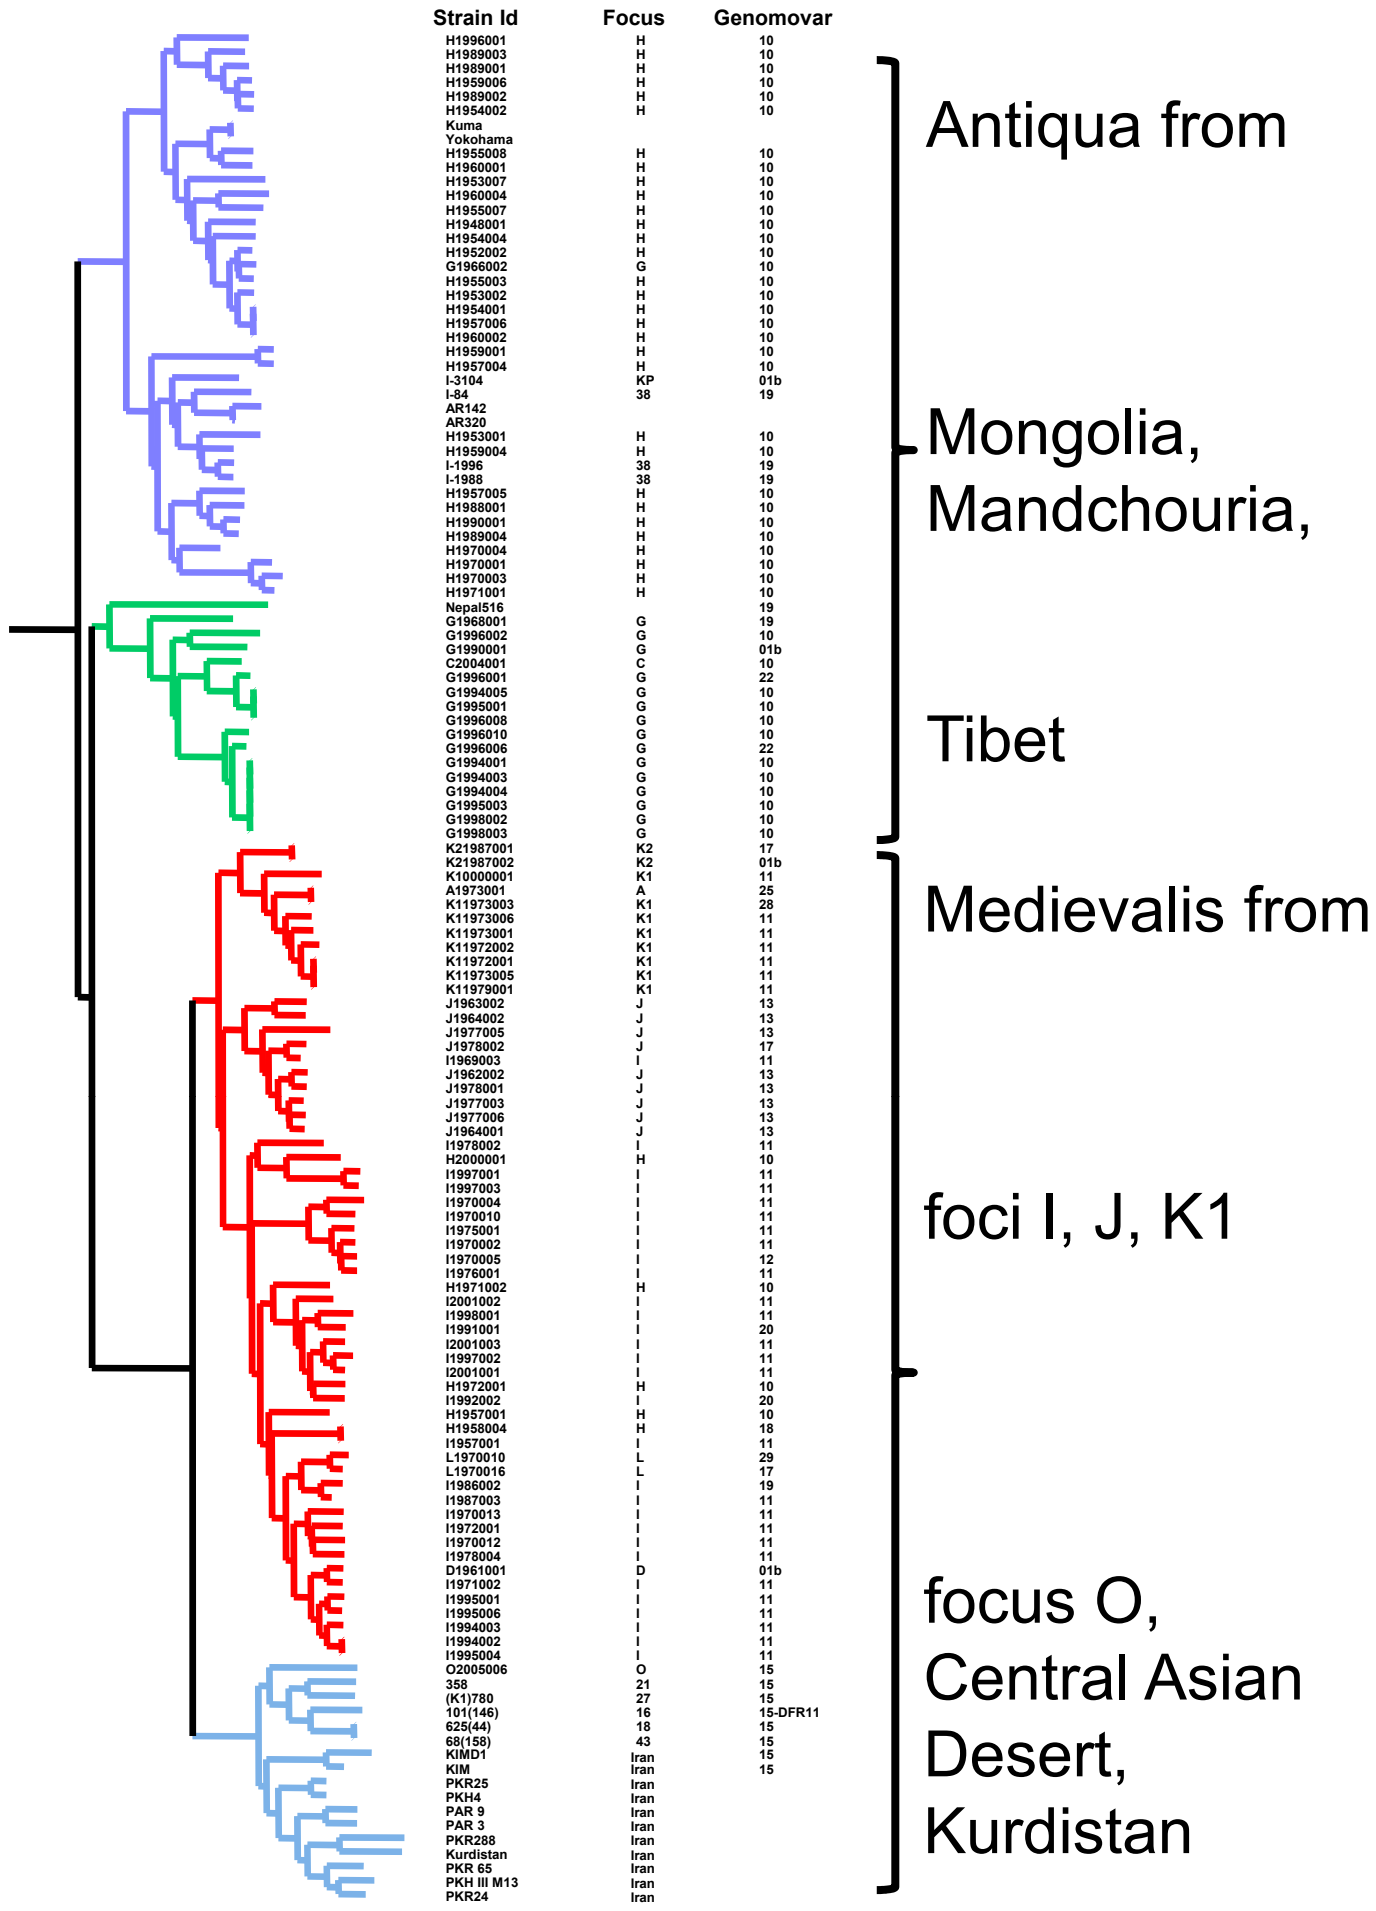

Supplement: pone.0006000.s001.pdf [file pone.0006000.s001.pdf]
