# Supplementary material for: Genotyping and Phylogenetic Analysis of Yersinia pestis by MLVA: Insights into the Worldwide Expansion of Central Asia Plague Foci
Source: PubMed Central journal article supplement (PMC2694983; doi:10.1371/journal.pone.0006000), 2009-06-22
Supplement: pone.0006000.s002.pdf [file pone.0006000.s002.pdf]

Strain Id Focus Location

Host or vector Genomovar

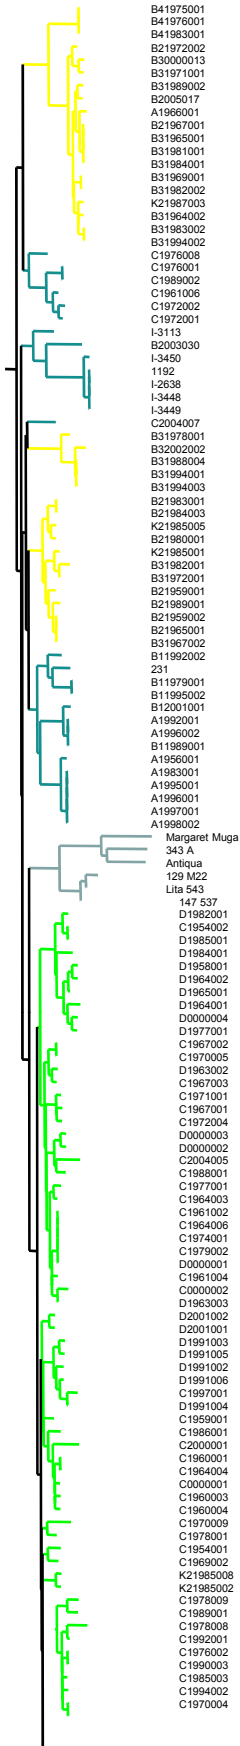

| Strain Id           | Focus | Location                                                                               | Host or vector                    | Genomovar |
|---------------------|-------|----------------------------------------------------------------------------------------|-----------------------------------|-----------|
| B41975001           | B4    | Nileke, Xinjiang                                                                       | <i>Marmota baibacina</i>          | 01a       |
| B41976001           | B4    | Nileke, Xinjiang                                                                       | <i>Spermophilus undulatus</i>     | 01a       |
| B41983001           | B4    | Nileke, Xinjiang                                                                       | <i>Marmota baibacina</i>          | 01a       |
| B21972002           | B2    | Hutubi, Xinjiang                                                                       | patient                           | 02        |
| B3000013            | B3    | Manasi, Xinjiang                                                                       | <i>Marmota baibacina</i>          | 02        |
| B31971001           | B3    | Wusu, Xinjiang                                                                         | <i>Marmota baibacina</i>          | 03        |
| B31989002           | B3    | Wusu, Xinjiang                                                                         | <i>Marmota baibacina</i>          | 03        |
| B2005017            | B2    | Wusu, Xinjiang                                                                         | <i>Citellophilus tesquorum</i>    | 16        |
| A1986001            | A     | Wuqia, Xinjiang                                                                        | <i>Marmota caudata</i>            | 16        |
| B21967001           | B2    | Hutubi, Xinjiang                                                                       | <i>Marmota baibacina</i>          | no pMT    |
| B31985001           | B3    | Jinghe, Xinjiang                                                                       | <i>Spermophilus undulatus</i>     | 03        |
| B31981001           | B3    | Jinghe, Xinjiang                                                                       | <i>Spermophilus undulatus</i>     | 03        |
| B31984001           | B3    | Wusu, Xinjiang                                                                         | <i>Spermophilus undulatus</i>     | 03        |
| B31969001           | B3    | Jinghe, Xinjiang                                                                       | <i>Marmota baibacina</i>          | 03        |
| B31982002           | B3    | Jinghe, Xinjiang                                                                       | <i>Marmota baibacina</i>          | 03        |
| K21987003           | K2    | Qiemo, Xinjiang                                                                        | <i>Rhadinopsylla liventricosa</i> | 01a       |
| B31964002           | B3    | Wusu, Xinjiang                                                                         | <i>Spermophilus undulatus</i>     | 03        |
| B31983002           | B3    | Wusu, Xinjiang                                                                         | <i>Citellophilus tesquorum</i>    | 03        |
| B31994002           | B3    | Wusu, Xinjiang                                                                         | <i>Marmota baibacina</i>          | 03        |
| C1976008            | C     | Wulan, Qinghai                                                                         | <i>Canis familiaris</i>           | 01b       |
| C1976001            | C     | Akesai, Gansu                                                                          | <i>Marmota himalayana</i>         | 01b       |
| C1989002            | C     | Akesai, Gansu                                                                          | <i>Oropsylla silantiewi</i>       | 05        |
| C1961006            | C     | Akesai, Gansu                                                                          | <i>Marmota himalayana</i>         | 01b       |
| C1972002            | C     | Lenghu, Qinghai                                                                        | <i>Marmota</i>                    | 05        |
| C1972001            | C     | Lenghu, Qinghai                                                                        | <i>Oropsylla silantiewi</i>       | 01b       |
| I3113               | 37    | Kyzyl-Khaty Tract, right bank of the Barlyk river, Sagly mesofocus, Tuva focus, Russia | <i>Citellus undulatus</i>         | 01b       |
| B2003030            | B2    | Wenquan, Xinjiang                                                                      | <i>Marmota baibacina</i>          | 01a       |
| I-3450              | B2    | Kadyr-Oruk Tract, Mongun-Taigin mesofocus, Tuva focus                                  | <i>Citellus undulatus</i>         | 02-DFR23  |
| 1192                | 37    | Tuva focus, Russia                                                                     | <i>Citellus undulatus</i>         | 02-DFR23  |
| I-2638              | 37    | Yigylak Tract, Mongun-Taigin mesofocus, Tuva focus, Russia                             | <i>Citellus undulatus</i>         | 02-DFR23  |
| I-3448              | 37    | Baure Tract, Mongun-Taigin mesofocus, Tuva focus, Russia                               | <i>Citellus undulatus</i>         | 02-DFR23  |
| I-3449              | 37    | Baure Tract, Mongun-Taigin mesofocus, Tuva focus, Russia                               | <i>Citellus undulatus</i>         | 02-DFR23  |
| C2004007            | C     | Qinghai                                                                                | patient                           | 01b       |
| B31978001           | B3    | Wusu, Xinjiang                                                                         | <i>Marmota baibacina</i>          | 02        |
| B32002002           | B3    | Wusu, Xinjiang                                                                         | <i>Marmota baibacina</i>          | 31        |
| B31980004           | B3    | Shawan, Xinjiang                                                                       | patient                           | 31        |
| B31994001           | B3    | Wusu, Xinjiang                                                                         | <i>Marmota baibacina</i>          | 02        |
| B31994003           | B3    | Shawan, Xinjiang                                                                       | <i>Pulex irritans</i>             | no pMT    |
| B21983001           | B2    | Changji, Xinjiang                                                                      | <i>Marmota baibacina</i>          | 02        |
| B21984003           | B2    | Changji, Xinjiang                                                                      | <i>Neohomatopinus palaeartus</i>  | 02        |
| K21985005           | K2    | Ruoqiang, Xinjiang                                                                     | <i>Oropsylla silantiewi</i>       | 31        |
| B21980001           | B2    | Hutubi, Xinjiang                                                                       | <i>Oropsylla silantiewi</i>       | 02        |
| K21985001           | K2    | Ruoqiang, Xinjiang                                                                     | <i>Oropsylla silantiewi</i>       | 31        |
| B31982001           | B3    | Jinghe, Xinjiang                                                                       | <i>Marmota baibacina</i>          | no pMT    |
| B31972001           | B3    | Jinghe, Xinjiang                                                                       | <i>Spermophilus undulatus</i>     | 02        |
| B21959001           | B2    | Manasi, Xinjiang                                                                       | <i>Marmota baibacina</i>          | 02        |
| B21959001           | B2    | Changji, Xinjiang                                                                      | <i>Marmota baibacina</i>          | 02        |
| B21959002           | B2    | Hutubi, Xinjiang                                                                       | <i>Marmota baibacina</i>          | 02        |
| B21965001           | B2    | Manasi, Xinjiang                                                                       | <i>Marmota baibacina</i>          | 02        |
| B31967002           | B3    | Wusu, Xinjiang                                                                         | <i>Marmota baibacina</i>          | 02        |
| B11992002           | B1    | Atushi, Xinjiang                                                                       | <i>Marmota baibacina</i>          | 04        |
| Z31                 | 33    | Aksai focus, Kirghizia                                                                 | <i>Marmota baibacina</i>          | 04        |
| B11979001           | B1    | Atushi, Xinjiang                                                                       | <i>Marmota baibacina</i>          | 04-DFR18  |
| B11995002           | B1    | Atushi, Xinjiang                                                                       | <i>Marmota baibacina</i>          | 04        |
| B12001001           | B1    | Wuqia, Xinjiang                                                                        | <i>Marmota baibacina</i>          | 01b       |
| A1982001            | A     | Wuqia, Xinjiang                                                                        | <i>Oropsylla silantiewi</i>       | 04        |
| A1986002            | A     | Wuqia, Xinjiang                                                                        | <i>Capra ibex</i>                 | 04        |
| B11989001           | B1    | Wuqia, Xinjiang                                                                        | <i>Marmota baibacina</i>          | 04        |
| A1956001            | A     | Wuqia, Xinjiang                                                                        | <i>Marmota caudata</i>            | 04        |
| A1983001            | A     | Wuqia, Xinjiang                                                                        | <i>Marmota caudata</i>            | 04        |
| A1995001            | A     | Wuqia, Xinjiang                                                                        | <i>Marmota caudata</i>            | 04        |
| A1996001            | A     | Wuqia, Xinjiang                                                                        | <i>Marmota caudata</i>            | 04        |
| A1997001            | A     | Wuqia, Xinjiang                                                                        | <i>Marmota caudata</i>            | 04        |
| A1988002            | A     | Wuqia, Xinjiang                                                                        | <i>Marmota caudata</i>            | 04        |
| Margaret Muga 343 A | A     | Kenya                                                                                  | Kenya                             |           |
| Antiqua 129 M22     | A     | RDC (Belgian Congo)                                                                    | RDC (Belgian Congo)               | no data   |
| Lita 543            | A     | RDC (Belgian Congo)                                                                    | RDC (Belgian Congo)               | 05        |
| 147 537             | A     | Kenya                                                                                  | Kenya                             |           |
| D1982001            | D     | Sunan, Gansu                                                                           | patient                           | 08        |
| C1954002            | C     | Hanan, Qinghai                                                                         | <i>Ochotona daurica</i>           | 05        |
| D1985001            | D     | Sunan, Gansu                                                                           | <i>Marmota himalayana</i>         | 08        |
| D1984001            | D     | Sunan, Gansu                                                                           | <i>Callopsylla dolabrifera</i>    | 08        |
| D1958001            | D     | Qilian, Qinghai                                                                        | <i>Marmota himalayana</i>         | 05        |
| D1964002            | D     | Menyuan, Qinghai                                                                       | <i>Canis familiaris</i>           | 08        |
| D1965001            | D     | Qilian, Qinghai                                                                        | <i>Mustela eversmanni</i>         | 08        |
| D1964001            | D     | Menyuan, Qinghai                                                                       | <i>Marmota</i>                    | 05        |
| D0000004            | D     | Menyuan, Qinghai                                                                       | <i>Marmota</i>                    | 08        |
| D1977001            | D     | Qilian, Qinghai                                                                        | <i>Marmota himalayana</i>         | 08        |
| C1967002            | C     | Gonghe, Qinghai                                                                        | patient                           | 08        |
| C1970005            | C     | Gonghe, Qinghai                                                                        | patient                           | 08        |
| D1963002            | D     | Menyuan, Qinghai                                                                       | <i>Mus musculus</i>               | 08        |
| C1967003            | C     | Gonghe, Qinghai                                                                        | <i>Pulex irritans</i>             | 08        |
| C1971001            | C     | Huangyuan, Qinghai                                                                     | patient                           | 07        |
| C1967001            | C     | Wulan, Qinghai                                                                         | <i>Marmota</i>                    | 08        |
| C1972004            | C     | Yumen, Gansu                                                                           | patient body                      | 08        |
| D0000003            | D     | Qilian, Qinghai                                                                        | patient                           | 08        |
| D0000002            | D     | Qilian, Qinghai                                                                        | patient                           | 08        |
| C2004005            | C     | Qinghai                                                                                | patient                           | 08        |
| C1988001            | C     | Xinghai, Qinghai                                                                       | <i>Linognathoides palaeartus</i>  | 08        |
| C1977001            | C     | Yumen, Gansu                                                                           | patient                           | 08        |
| C1964003            | C     | Hayan, Qinghai                                                                         | <i>Ixodes crenulatus</i>          | 08        |
| C1961002            | C     | Gonghe, Qinghai                                                                        | <i>Callopsylla dolabrifera</i>    | 08        |
| C1964006            | C     | Hayan, Qinghai                                                                         | <i>Oropsylla silantiewi</i>       | 08        |
| C1974001            | C     | Gangcha, Qinghai                                                                       | <i>Rhadinopsylla liventricosa</i> | 08        |
| C1979002            | C     | Mangya, Qinghai                                                                        | <i>Marmota himalayana</i>         | 08        |
| D0000001            | D     | Qilian, Qinghai                                                                        | patient                           | 08        |
| C1961004            | C     | Sunan, Gansu                                                                           | <i>Marmota himalayana</i>         | 08        |
| C0000002            | C     | Gonghe, Qinghai                                                                        | <i>Pulex irritans</i>             | 08        |
| D1963003            | D     | Menyuan, Qinghai                                                                       | <i>Neopsylla hongyangensis</i>    | 08        |
| D2001002            | D     | Tongde, Qinghai                                                                        | patient                           | 08        |
| D2001001            | D     | Tongde, Qinghai                                                                        | <i>Vulpes vulpes</i>              | 08        |
| D1991003            | D     | Tongde, Qinghai                                                                        | <i>Marmota himalayana</i>         | 08        |
| D1991005            | D     | Zeku, Qinghai                                                                          | <i>Allactaga sibirica</i>         | 08        |
| D1991002            | D     | Zeku, Qinghai                                                                          | <i>Marmota himalayana</i>         | 08        |
| D1991006            | D     | Zeku, Qinghai                                                                          | <i>Frontopsylla wagneri</i>       | 08        |
| C1997001            | C     | Angqian, Qinghai                                                                       | <i>Ovis aries</i>                 | 07        |
| D1991004            | D     | Zeku, Qinghai                                                                          | <i>Marmota</i>                    | 01b       |
| C1959001            | C     | Xiahe, Gansu                                                                           | <i>Marmota himalayana</i>         | 08        |
| C1986001            | C     | Tongren, Qinghai                                                                       | <i>Marmota</i>                    | 07        |
| C2000001            | C     | Delingha, Qinghai                                                                      | <i>Neohomatopinus palaeartus</i>  | 07        |
| C1960001            | C     | Tongren, Qinghai                                                                       | patient                           | 07        |
| C1964004            | C     | Gannan, Gansu                                                                          | <i>Marmota himalayana</i>         | 07        |
| C0000001            | C     | Xunhua, Qinghai                                                                        | <i>Marmota</i>                    | 07        |
| C1960003            | C     | Xiahe, Gansu                                                                           | <i>Marmota himalayana</i>         | 07        |
| C1960004            | C     | Xiahe, Gansu                                                                           | <i>Marmota himalayana</i>         | 07        |
| C1970009            | C     | Xunhua, Qinghai                                                                        | <i>Marmota</i>                    | 07        |
| C1978001            | C     | Maduo, Qinghai                                                                         | <i>Marmota</i>                    | 01b       |
| C1954001            | C     | Gulan, Qinghai                                                                         | <i>Marmota himalayana</i>         | 05        |
| C1969002            | C     | Wulan, Qinghai                                                                         | <i>Rhipicephalus sanguineus</i>   | 08        |
| K21985008           | K2    | Ruoqiang, Xinjiang                                                                     | <i>Marmota himalayana</i>         | 05        |
| K21985002           | K2    | Ruoqiang, Xinjiang                                                                     | <i>Marmota himalayana</i>         | 05        |
| C1978009            | C     | Dingqing, Tibet                                                                        | <i>Marmota himalayana</i>         | 05        |
| C1989001            | C     | Zhaduo, Qinghai                                                                        | patient                           | 01b       |
| C1978008            | C     | Zhiduo, Qinghai                                                                        | <i>Felis sp</i>                   | 05        |
| C1992001            | C     | Nierong, Tibet                                                                         | <i>Marmota himalayana</i>         | 05        |
| C1976002            | C     | Nagou, Tibet                                                                           | <i>Marmota himalayana</i>         | 06        |
| C1990003            | C     | Anduo, Tibet                                                                           | <i>Marmota himalayana</i>         | 05        |
| C1985003            | C     | Gulan, Qinghai                                                                         | <i>Marmota himalayana</i>         | 05        |
| C1994002            | C     | Biru, Tibet                                                                            | <i>Ovis aries</i>                 | 06        |
| C1970004            | C     | Qumtala, Qinghai                                                                       | <i>Marmota himalayana</i>         | 05        |

Intermedium and Antiqua from

foci A, B, C, 33, 37

Antiqua from Africa

Antiqua from foci C and D
