# Supplementary material for: Genotyping and Phylogenetic Analysis of Yersinia pestis by MLVA: Insights into the Worldwide Expansion of Central Asia Plague Foci
Source: PubMed Central journal article supplement (PMC2694983; doi:10.1371/journal.pone.0006000), 2009-06-22
Supplement: pone.0006000.s003.pdf [file pone.0006000.s003.pdf]

Strain Id Focus bv. Geographic origin Host or vector Genomovar

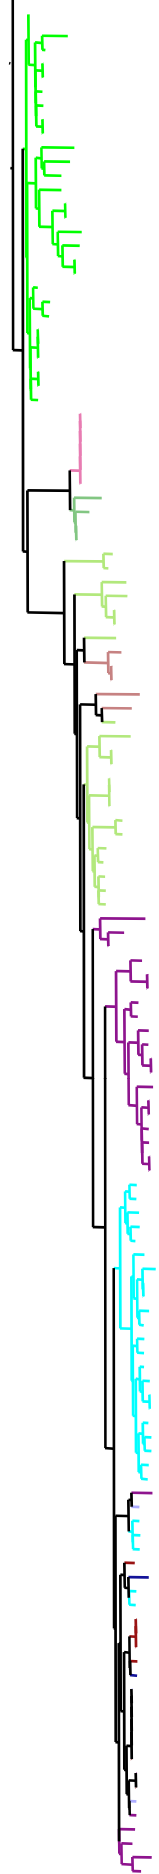

Antiqua focus C (continued)

Antiqua focus E

Orientalis, Fujian and "Third pandemic"

Orientalis from Yunnan, Guangxi provinces and other countries (Vietnam, Myanmar)

|                       |       |            |                                 |                                   |          |
|-----------------------|-------|------------|---------------------------------|-----------------------------------|----------|
| C1992001              | C     | Antiqua    | Nierong, Tibet                  | <i>Marmota himalayana</i>         | 05       |
| C1976002              | C     | Antiqua    | Naqu, Tibet                     | <i>Marmota himalayana</i>         | 06       |
| C1990003              | C     | Antiqua    | Anxius, Tibet                   | <i>Marmota himalayana</i>         | 05       |
| C1994002              | C     | Antiqua    | Guinan, Qinghai                 | <i>Marmota himalayana</i>         | 05       |
| C1970004              | C     | Antiqua    | Biru, Tibet                     | <i>Ovis aries</i>                 | 06       |
| C1988004              | C     | Antiqua    | Qumalai, Qinghai                | <i>Marmota himalayana</i>         | 05       |
| C1964007              | C     | Antiqua    | Nierong, Tibet                  | patient                           | 05       |
| C1975003              | C     | Antiqua    | Yushu, Qinghai                  | <i>Marmota himalayana</i>         | 05       |
| C1990002              | C     | Antiqua    | Yushu, Qinghai                  | <i>Ovis aries</i>                 | 05       |
| C1974005              | C     | Antiqua    | Baqing, Tibet                   | <i>Marmota himalayana</i>         | 05       |
| C1974005              | C     | Antiqua    | Zhaduo, Qinghai                 | <i>Felis sp</i>                   | 07       |
| C1964005              | C     | Antiqua    | Xinghai, Qinghai                | <i>Pulex irritans</i>             | 05       |
| C1999001              | C     | Antiqua    | Gonghe, Qinghai                 | patient                           | 05       |
| C1999001              | C     | Antiqua    | Shiqu, Sichuan                  | patient                           | 05       |
| C1990004              | C     | Antiqua    | Angqian, Qinghai                | <i>Marmota</i>                    | 01b      |
| C1978003              | C     | Antiqua    | Yushu, Qinghai                  | <i>Procapra picticaudata</i>      | 05       |
| C1978011              | C     | Antiqua    | Angqian, Qinghai                | <i>Meles meles</i>                | 05       |
| C1983002              | C     | Antiqua    | Changdu, Tibet                  | <i>Marmota himalayana</i>         | 05       |
| C1978013              | C     | Antiqua    | Gomud, Qinghai                  | <i>Lynx lynx</i>                  | 07       |
| C1931001              | C     | Antiqua    | Gomud, Qinghai                  | <i>Marmota himalayana</i>         | 05       |
| C1978002              | C     | Antiqua    | Naqu, Tibet                     | <i>Marmota himalayana</i>         | 06       |
| C1980002              | C     | Antiqua    | Qumalai, Qinghai                | patient                           | 05       |
| C1983004              | C     | Antiqua    | Chaya, Tibet                    | <i>Marmota himalayana</i>         | 05       |
| C1976003              | C     | Antiqua    | Naqu, Tibet                     | <i>Marmota himalayana</i>         | 06       |
| C1978004              | C     | Antiqua    | Naqu, Tibet                     | <i>Marmota himalayana</i>         | 06       |
| C1976007              | C     | Antiqua    | Naqu, Tibet                     | <i>Marmota himalayana</i>         | 06       |
| E1954001              | E     | Antiqua    | Jianchuan, Yunnan               | <i>Eothenomys miletus</i>         | 07       |
| E1977001              | E     | Antiqua    | Jianchuan, Yunnan               | <i>Clenophthalmus quadratus</i>   | 07       |
| E1979002              | E     | Antiqua    | Jianchuan, Yunnan               | <i>Stenischia humilis</i>         | 07       |
| E1982001              | E     | Antiqua    | Jianchuan, Yunnan               | <i>Apodemus chevieri</i>          | 07       |
| E1983004              | E     | Antiqua    | Jianchuan, Yunnan               | <i>Eothenomys miletus</i>         | 07       |
| E1984002              | E     | Antiqua    | Jianchuan, Yunnan               | <i>Neopsylla specialis Jordan</i> | 07       |
| E1977003              | E     | Antiqua    | Jianchuan, Yunnan               | <i>Apodemus speciosus</i>         | 09       |
| F1954001              | F     | Antiqua    | Xiangyun, Yunnan                | <i>Rattus flavipectus</i>         | 09       |
| E1954003              | E     | Antiqua    | Jianchuan, Yunnan               | <i>Stenischia humilis</i>         | 09       |
| E1957001              | E     | Antiqua    | Jianchuan, Yunnan               | <i>Neopsylla specialis</i>        | 09       |
| Java9                 | O     | Orientalis | Surakarta, Java, Indonesia      | patient                           |          |
| Java10                | O     | Orientalis | Surakarta, Java, Indonesia      | patient                           |          |
| Johannesburg K120-043 | O     | Orientalis | South Africa                    | patient                           |          |
| 195/P                 | O     | Orientalis | India                           |                                   |          |
| M23                   | O     | Orientalis |                                 |                                   |          |
| GB                    | O     | Orientalis | UK                              |                                   |          |
| Fay 524               | O     | Orientalis | Senegal                         |                                   |          |
| F1943001              | F     | Orientalis | Fuzhou, Fujian                  | patient                           | 09       |
| F1950001              | F     | Orientalis | Hua'an, Fujian                  | <i>Rattus</i>                     | 09       |
| F1952004              | F     | Orientalis | Putian, Fujian                  | <i>Rattus</i>                     | 09       |
| F1946001              | F     | Orientalis | Gutian, Fujian                  | patient                           | 09       |
| F1943002              | F     | Orientalis | Fuzhou, Fujian                  | patient                           | 09       |
| CO92                  | O     | Orientalis | Colorado, USA                   | patient                           | 09       |
| Thierno 523           | O     | Orientalis | Senegal                         |                                   |          |
| Exu38                 | O     | Orientalis | Exu, Pernambuco, Brasil         |                                   |          |
| Exu21                 | O     | Orientalis | Exu, Pernambuco, Brasil         |                                   |          |
| TS                    | O     | Orientalis |                                 |                                   |          |
| TW                    | O     | Orientalis |                                 |                                   |          |
| Yp1255                | O     | Orientalis |                                 |                                   |          |
| Barabanki 4           | O     | Orientalis | Barabanki, Uttar Pradesh, India |                                   |          |
| Barabanki 3           | O     | Orientalis | Barabanki, Uttar Pradesh, India |                                   |          |
| IP 16=6/69            | O     | Orientalis | Madagascar                      |                                   |          |
| Hambourg9 695         | O     | Orientalis | Germany                         |                                   |          |
| MAKAN 020             | O     | Orientalis | Senegal                         | patient                           |          |
| EV76                  | O     | Orientalis | Madagascar                      | patient                           | 09-DFR10 |
| G32pgm+               | O     | Orientalis |                                 |                                   |          |
| E1954002              | E     | Orientalis | Jianchuan, Yunnan               | <i>Rattus flavipectus</i>         | 09       |
| E1984001              | E     | Orientalis | Jianchuan, Yunnan               | <i>Apodemus chevieri</i>          | 09       |
| E1984005              | E     | Orientalis | Jianchuan, Yunnan               | <i>Rattus nitidus</i>             | 09       |
| F1953002              | F     | Orientalis | Baoshan, Yunnan                 | <i>Rattus flavipectus</i>         | 07       |
| F1953003              | F     | Orientalis | Midu, Yunnan                    | <i>Rattus flavipectus</i>         | 09       |
| F1955001              | F     | Orientalis | Xiangyun, Yunnan                | <i>Rattus flavipectus</i>         | 09       |
| F1990013              | F     | Orientalis | Yingjiang, Yunnan               | patient                           | 09       |
| F1990015              | F     | Orientalis | Lianghe, Yunnan                 | <i>Rattus flavipectus</i>         | 09       |
| F1990010              | F     | Orientalis | Longchuan, Yunnan               | <i>Xenopsylla cheopis</i>         | 09       |
| F1982002              | F     | Orientalis | Longchuan, Yunnan               | <i>Rattus flavipectus</i>         | 09       |
| F1991002              | F     | Orientalis | Wanding, Yunnan                 | <i>Rattus flavipectus</i>         | 09       |
| F1996007              | F     | Orientalis | Mojiang, Yunnan                 | <i>Xenopsylla cheopis</i>         | 09       |
| F1984002              | F     | Orientalis | Yingjiang, Yunnan               | <i>Rattus flavipectus</i>         | 09       |
| F1981011              | F     | Orientalis | Gengma, Yunnan                  | <i>Rattus flavipectus</i>         | 09       |
| F1992001              | F     | Orientalis | Lancang, Yunnan                 | <i>Rattus flavipectus</i>         | 09       |
| F1984003              | F     | Orientalis | Yingjiang, Yunnan               | <i>Xenopsylla cheopis</i>         | 09       |
| F1983006              | F     | Orientalis | Baoshan, Yunnan                 | <i>Leptopsylla segnis</i>         | 09       |
| F1982003              | F     | Orientalis | Ruili, Yunnan                   | <i>Rattus flavipectus</i>         | 09       |
| F1992012              | F     | Orientalis | Cangyuan, Yunnan                | <i>Rattus flavipectus</i>         | 09       |
| Dalat 129             | Viet. | Orientalis | Dalat, Vietnam                  | patient                           |          |
| Dalat 161             | Viet. | Orientalis | Dalat, Vietnam                  | patient                           |          |
| Dalat 286-06          | Viet. | Orientalis | Dalat, Vietnam                  | patient                           |          |
| Dalat 266             | Viet. | Orientalis | Dalat, Vietnam                  | patient                           |          |
| Dalat 268             | Viet. | Orientalis | Dalat, Vietnam                  | patient                           |          |
| Dalat 320             | Viet. | Orientalis | Dalat, Vietnam                  | patient                           |          |
| Saigon 64, 1244       | Viet. | Orientalis | Saigon, Vietnam                 | patient                           |          |
| Saigon 64, 1265       | Viet. | Orientalis | Saigon, Vietnam                 | patient                           |          |
| Saigon 64, 1264       | Viet. | Orientalis | Saigon, Vietnam                 | patient                           |          |
| Saigon 64, 1318       | Viet. | Orientalis | Saigon, Vietnam                 | patient                           |          |
| Dalat 245             | Viet. | Orientalis | Dalat, Vietnam                  | patient                           |          |
| Dalat 269             | Viet. | Orientalis | Dalat, Vietnam                  | patient                           |          |
| Dalat 146             | Viet. | Orientalis | Dalat, Vietnam                  | patient                           |          |
| Saigon 64, 1205       | Viet. | Orientalis | Saigon, Vietnam                 | patient                           |          |
| Dalat 272             | Viet. | Orientalis | Dalat, Vietnam                  | patient                           |          |
| Dalat                 | Viet. | Orientalis | Dalat, Vietnam                  | patient                           |          |
| Dalat 270             | Viet. | Orientalis | Dalat, Vietnam                  | patient                           |          |
| Dalat 267             | Viet. | Orientalis | Dalat, Vietnam                  | patient                           |          |
| Dalat 280             | Viet. | Orientalis | Dalat, Vietnam                  | patient                           |          |
| Dalat 180             | Viet. | Orientalis | Dalat, Vietnam                  | patient                           |          |
| Dalat 321             | Viet. | Orientalis | Dalat, Vietnam                  | patient                           |          |
| Dalat 318             | Viet. | Orientalis | Dalat, Vietnam                  | patient                           |          |
| F1984001              | F     | Orientalis | Yingjiang, Yunnan               | <i>Rattus flavipectus</i>         | 18       |
| F2002007              | F     | Orientalis | Xingyi, Guizhou                 | <i>Rattus flavipectus</i>         | 09       |
| Dalat 299             | Viet. | Orientalis | Dalat, Vietnam                  | patient                           |          |
| Dalat 298             | Viet. | Orientalis | Dalat, Vietnam                  | patient                           |          |
| Dalat 279             | Viet. | Orientalis | Dalat, Vietnam                  | patient                           |          |
| F2000008              | F     | Orientalis | Longlin, Guangxi                | patient                           | 09       |
| F1991009              | F     | Orientalis | Courageous, Myanmar             | <i>Rattus flavipectus</i>         | 09       |
| Dalat 296             | Viet. | Orientalis | Dalat, Vietnam                  | patient                           |          |
| Dalat 292             | Viet. | Orientalis | Dalat, Vietnam                  | patient                           |          |
| F0000002              | F     | Orientalis | Longlin, Guangxi                |                                   | 09       |
| F1991003              | F     | Orientalis | Wanding, Yunnan                 | <i>Rattus flavipectus</i>         | 09       |
| F2000006              | F     | Orientalis | Longlin, Guangxi                | <i>Rattus flavipectus</i>         | 09       |
| F1982008              | F     | Orientalis | Longchuan, Yunnan               | <i>Xenopsylla cheopis</i>         | 09       |
| F1985007              | F     | Orientalis | Myanmar                         | <i>Rattus flavipectus</i>         | 09       |
| F2000002              | F     | Orientalis | Xingyi, Guizhou                 | <i>Rattus flavipectus</i>         | 09       |
| F2000009              | F     | Orientalis | Longlin, Guangxi                | patient                           | 09       |
| F2002006              | F     | Orientalis | Xingyi, Guizhou                 | <i>Rattus flavipectus</i>         | 09       |
| Birmanie 637          | Myan. | Orientalis | Myanmar                         |                                   |          |
| Birmanie 548          | Myan. | Orientalis | Myanmar                         |                                   |          |
| F2000010              | F     | Orientalis | Longlin, Guangxi                | <i>Rattus flavipectus</i>         | 09       |
| F1983001              | F     | Orientalis | Lancang, Yunnan                 | <i>Rattus flavipectus</i>         | 18       |
| F2000007              | F     | Orientalis | Longlin, Guangxi                | <i>Rattus flavipectus</i>         | 09       |
| F2000003              | F     | Orientalis | Xingyi, Guizhou                 | <i>Rattus flavipectus</i>         | 09       |
| F1996001              | F     | Orientalis | Mojiang, Yunnan                 | <i>Rattus flavipectus</i>         | 09       |
| F1996002              | F     | Orientalis | Mojiang, Yunnan                 | <i>Rattus flavipectus</i>         | 18       |
| F2002001              | F     | Orientalis | Honghe, Yunnan                  | <i>Rattus flavipectus</i>         | 09       |
| F1991007              | F     | Orientalis | Courageous, Myanmar             | <i>Rattus flavipectus</i>         | 09       |
| F1991006              | F     | Orientalis | Zhenkang, Yunnan                | <i>Rattus flavipectus</i>         | 09       |
