# Supplementary material for: Genotyping and Phylogenetic Analysis of Yersinia pestis by MLVA: Insights into the Worldwide Expansion of Central Asia Plague Foci
Source: PubMed Central journal article supplement (PMC2694983; doi:10.1371/journal.pone.0006000), 2009-06-22
Supplement: pone.0006000.s005.pdf [file pone.0006000.s005.pdf]

Supplementary Table 2 List of the isolates used for genotyping

| Focus | Number of isolates | Biovar                        | Geographical origin          |
|-------|--------------------|-------------------------------|------------------------------|
| A     | 10                 | Antiqua                       | Xinjiang, China              |
| A     | 1                  | Medievalis                    | Xinjiang, China              |
| B1    | 5                  | Antiqua                       | Xinjiang, China              |
| B1    | 1                  | Medievalis                    | Xinjiang, China              |
| B2    | 9                  | Antiqua                       | Xinjiang, China              |
| B3    | 20                 | Antiqua                       | Xinjiang, China              |
| B4    | 7                  | Antiqua                       | Xinjiang, China              |
| C     | 54                 | Antiqua                       | Qinghai, China               |
| C     | 17                 | Antiqua                       | Gansu, China                 |
| C     | 10                 | Antiqua                       | Tibet, China                 |
| D     | 20                 | Antiqua                       | Qinghai, China               |
| D     | 3                  | Antiqua                       | Gansu, China                 |
| E     | 13                 | Antiqua                       | Yunnan, China                |
| E     | 3                  | Orientalis                    | Yunnan, China                |
| F     | 1                  | Antiqua                       | Yunnan, China                |
| F     | 24                 | Orientalis                    | Yunnan, China                |
| F     | 7                  | Orientalis                    | Guangxi, China               |
| F     | 6                  | Orientalis                    | Guizhou, China               |
| F     | 5                  | Orientalis                    | Fujian, China                |
| F     | 4                  | Orientalis                    | Myanmar                      |
| G     | 16                 | Antiqua                       | Tibet, China                 |
| H     | 1                  | Ypseu**                       | Jilin, China                 |
| H     | 9                  | Antiqua                       | Jilin, China                 |
| H     | 21                 | Antiqua                       | Inner Mongolia, China        |
| H     | 1                  | Antiqua                       | Heilongjiang, China          |
| H     | 4                  | Medievalis                    | Inner Mongolia, China        |
| H     | 1                  | Medievalis                    | Jilin, China                 |
| I     | 14                 | Medievalis                    | Inner Mongolia, China        |
| I     | 6                  | Medievalis                    | Ningxia, China               |
| I     | 9                  | Medievalis                    | Hebei, China                 |
| I     | 4                  | Medievalis                    | Shanxi, China                |
| J     | 5                  | Medievalis                    | Gansu, China                 |
| J     | 7                  | Medievalis                    | Ningxia, China               |
| K1    | 11                 | Medievalis                    | Xinjiang, China              |
| K2    | 9                  | Antiqua                       | Xinjiang, China              |
| L     | 10                 | <i>Microtus/xilingolensis</i> | Inner Mongolia, China        |
| L     | 2                  | Medievalis                    | Inner Mongolia, China        |
| M     | 2                  | Antiqua                       | Qinghai, China               |
| M     | 20                 | <i>Microtus/qinghaiensis</i>  | Sichuan, China               |
| M     | 11                 | <i>Microtus/qinghaiensis</i>  | Qinghai, China               |
| O     | 1                  | Medievalis                    | Xinjiang, China              |
| 36*   | 9                  | <i>Microtus/altaica</i>       | Mountain-Altai focus, Russia |

|         |   |                           |                                                    |
|---------|---|---------------------------|----------------------------------------------------|
| BP*     | 3 | <i>Microtus/ulegeica</i>  | Bayanölgié province (aymag), Mongolia              |
| 4-6*    | 3 | <i>Microtus/caucasica</i> | Tran-Caucasian-highland focus, Armenia             |
| 5 or 6* | 2 | <i>Microtus/caucasica</i> | Azerbaijan, Tran-Caucasian-highland focus          |
| 34*     | 2 | <i>Microtus/hissarica</i> | Gissar focus, Tadjikistan                          |
| 33*     | 1 | Antiqua                   | Aksai focus, Kirghizia                             |
| MO*     | 1 | Antiqua                   | Khentei, Mongolia                                  |
| 37*     | 6 | Antiqua                   | Tuva focus, Russia                                 |
| 38*     | 3 | Antiqua                   | Trans-Baikal focus, Russia                         |
| 27*     | 1 | Medievalis                | Kyzyl-Kum focus, Uzbekistan, Kazakhstan            |
| 21*     | 1 | Medievalis                | North-Pre-Aral focus, Kazakhstan                   |
| 18*     | 1 | Medievalis                | Ural-Emba focus, Kazakhstan                        |
| 16*     | 1 | Medievalis                | Volga-Ural sandy focus, Russia                     |
| 43*     | 1 | Medievalis                | Pre-Caspian sandy focus, Russia                    |
| /       | 1 | Medievalis                | KIMD1 (Iran/Kurdistan) used for study in lab       |
| /       | 1 | Antiqua                   | From human laboratory-acquired infection case, FSU |
| /       | 1 | Orientalis                | EV76 (Madagascar), live attenuated vaccine strain  |

\* The foci in the Central Asia.

\*\* *Y. pseudotuberculosis*
